# Supplementary material for: Increased Risk of Nonalcoholic Fatty Liver Disease in Individuals with High Weight Variability
Source: PubMed Central journal article supplement — Endocrinol Metab (Seoul). 2021 Aug 27;36(4):845–54. doi: 10.3803/EnM.2021.1098 (PMC8419611; doi:10.3803/enm.2021.1098), 2021-08-27
Supplement: enm-2021-1098-suppl2.pdf [file enm-2021-1098-suppl2.pdf]

**Supplemental Table S2.** Risk for NAFLD (Fatty Liver Index  $\geq 60$ ) According to the Quartile of Average Successive Variability of Bodyweight

|            | Presence of NAFLD | Model 1          | Model 2          | Model 3          | Model 4          |
|------------|-------------------|------------------|------------------|------------------|------------------|
| Quartile 1 | 66 (1.8)          | 1 (reference)    | 1 (reference)    | 1 (reference)    | 1 (reference)    |
| Quartile 2 | 118 (3.1)         | 1.77 (1.30–2.40) | 1.57 (1.15–2.14) | 1.55 (1.12–2.14) | 1.42 (1.01–2.00) |
| Quartile 3 | 192 (5.0)         | 2.94 (2.22–3.91) | 2.37 (1.77–3.16) | 2.38 (1.76–3.22) | 1.96 (1.43–2.70) |
| Quartile 4 | 375 (9.8)         | 6.08 (4.66–7.93) | 5.08 (3.87–6.68) | 5.00 (3.76–6.66) | 2.74 (2.01–3.72) |

Values are expressed as number (%) or odds ratio (95% confidence interval). Model 1: No adjustment; Model 2: Adjusted for age, sex; Model 3: Adjusted for Model 2+fasting blood glucose, systolic blood pressure, triglyceride, low-density lipoprotein cholesterol, smoking amount, exercise, and alcohol frequency; Model 4: Adjusted for Model 2+glycated hemoglobin, systolic blood pressure, triglyceride, low-density lipoprotein cholesterol, smoking amount, exercise and alcohol frequency, body mass index, homeostasis model assessment of insulin resistance, aspartate transaminase, and alanine aminotransferase.

NAFLD, nonalcoholic fatty liver disease.
