# Supplementary figures and images for: Increased Risk of Nonalcoholic Fatty Liver Disease in Individuals with High Weight Variability
Source: PubMed Central journal article supplement — Endocrinol Metab (Seoul). 2021 Aug 27;36(4):845–54. doi: 10.3803/EnM.2021.1098 (PMC8419611; doi:10.3803/enm.2021.1098), 2021-08-27

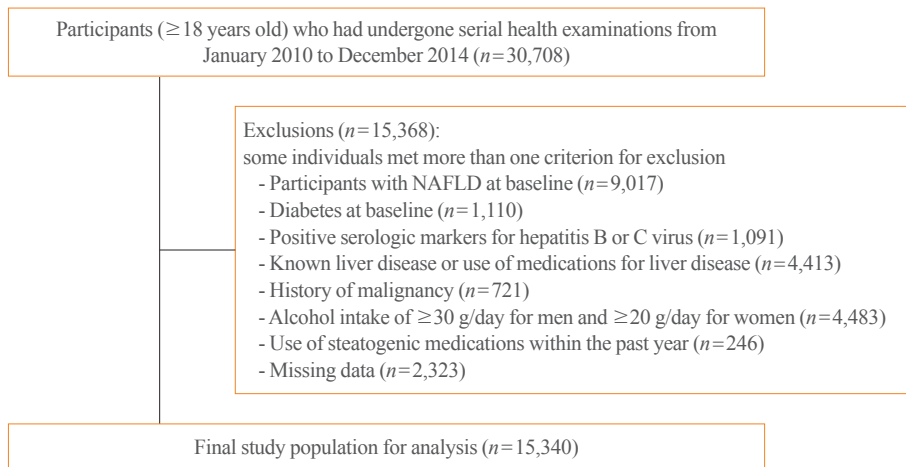

**Supplemental Fig. S1.** Flow chart of study participants. NAFLD, nonalcoholic fatty liver disease.

Supplement: enm-2021-1098-suppl3.pdf [file enm-2021-1098-suppl3.pdf]
